# Supplementary material for: Inactivation of Target RNA Cleavage of a III-B CRISPR-Cas System Induces Robust Autoimmunity in Saccharolobus islandicus
Source: MDPI journal article supplement (doi:10.3390/ijms23158515), 2022-07-31
Supplement: s1 [file s1]

## Supplementary data

### 1. Supplementary tables:

**Supplementary table S1. *Sulfolobus* strains used in this work**

| Strains                                                      | Genotype and features                                                                                                                                                                                | Reference |
|--------------------------------------------------------------|------------------------------------------------------------------------------------------------------------------------------------------------------------------------------------------------------|-----------|
| $\Delta\beta$ E233                                           | Derived from <i>S. islandicus</i> Rey15A, carrying deletion of the <i>pyrEF</i> genes and the type III-B Cmr- $\beta$ locus including 7 <i>cmr</i> - $\beta$ genes                                   | (1)       |
| $\Delta\beta$ E233S1                                         | Carrying deletion of the <i>pyrEF</i> genes, the <i>lacS</i> gene and the type III-B Cmr- $\beta$ locus including 7 <i>cmr</i> - $\beta$ genes                                                       | (2)       |
| $\Delta\alpha\Delta\beta$ E233S1                             | Carrying deletion of the <i>pyrEF</i> genes, the <i>lacS</i> gene, the Cmr- $\alpha$ locus including 6 <i>cmr</i> - $\alpha$ genes and the Cmr- $\beta$ locus including 7 <i>cmr</i> - $\beta$ genes | (2)       |
| $\Delta$ array $\Delta\beta$ E233                            | Derived from $\Delta\beta$ E233, carrying deletion of two CRISPR loci and the type I-A module                                                                                                        | This work |
| $\Delta$ array $\Delta\beta$ E233S1                          | Derived from $\Delta\beta$ E233S1, carrying deletion of two CRISPR loci and the type I-A module; equal to MF1                                                                                        | (3)       |
| 4 $\alpha$ -H16A                                             | Derived from $\Delta\beta$ E233, carrying a single mutation (H16A) of <i>cmr4</i> $\alpha$                                                                                                           | This work |
| 4 $\alpha$ -D83A                                             | Derived from $\Delta\beta$ E233, carrying a single mutation (D83A) of <i>cmr4</i> $\alpha$                                                                                                           | This work |
| 4 $\alpha$ -K46/50A                                          | Derived from $\Delta\beta$ E233, carrying a double mutation (K46A, K50A) of <i>cmr4</i> $\alpha$                                                                                                     | This work |
| 4 $\alpha$ -W197A                                            | Derived from $\Delta\beta$ E233, carrying a single mutation (W197A) of <i>cmr4</i> $\alpha$                                                                                                          | This work |
| 4 $\alpha$ -E199/Y201A                                       | Derived from $\Delta\beta$ E233, carrying a double mutation (E199A, Y201A) of <i>cmr4</i> $\alpha$                                                                                                   | This work |
| 4 $\alpha$ -K251A                                            | Derived from $\Delta\beta$ E233, carrying a single mutation (K251A) of <i>cmr4</i> $\alpha$                                                                                                          | This work |
| 4 $\alpha$ -4G-A                                             | Derived from $\Delta\beta$ E233, carrying a quadruple mutation (G244A, G245A, G250A, G252A) of <i>cmr4</i> $\alpha$                                                                                  | This work |
| HD <sup>m</sup>                                              | Derived from $\Delta\beta$ E233, carrying a double mutation (H14A, D15A) of <i>cmr2</i> $\alpha$                                                                                                     | This work |
| Palm <sup>m</sup>                                            | Derived from $\Delta\beta$ E233, carrying a double mutation (D667A, D668A) of <i>cmr2</i> $\alpha$                                                                                                   | This work |
| HD <sup>m</sup> Palm <sup>m</sup>                            | Derived from $\Delta\beta$ E233, carrying a quadruple mutation (H14A, D15A, D667A, D668A) donor DNA of <i>cmr2</i> $\alpha$                                                                          | This work |
| HD <sup>m</sup> Palm <sup>m</sup> 4 $\alpha$ <sup>D27A</sup> | Derived from $\Delta\beta$ -HD <sup>m</sup> Palm <sup>m</sup> , carrying a single mutation (D27A) of <i>cmr4</i> $\alpha$                                                                            | This work |

**Supplementary table S2. Plasmids used in this work**

| Plasmids           | Genotype and features                                                                                                                                   | Reference |
|--------------------|---------------------------------------------------------------------------------------------------------------------------------------------------------|-----------|
| pSeSD1             | A <i>Sulfolobus-E. coli</i> shuttle vector with an expression cassette controlled under ParaS-SD promoter                                               | (4)       |
| pSe-Rp             | A <i>Sulfolobus</i> artificial mini-CRISPR cloning vector                                                                                               | (5)       |
| pAC-SS1            | An artificial mini-CRISPR locus plasmid derived from pSe-Rp, carrying one spacer matching the protospacer 1 (SS1) of the <i>S. islandicus</i> lacS gene | (5)       |
| pAC-MS1            | Derived from pSeSD1, carrying an artificial CRISPR locus with 10 copies of 43 nt SS1 spacer.                                                            | (6)       |
| pAC-cmr6α-10His    | Derived from pAC-MS1, both carrying an artificial CRISPR locus with 10 copies of SS1 spacer and expressing His-tagged Cmr6α                             | (6)       |
| pS10i              | An invader plasmid carrying a target sequence of spacer 10 in CRISPR locus 2 in <i>S. islandicus</i>                                                    | (7)       |
| pSi_1125           | A self-targeting plasmid expressing crRNA targeting the <i>SiRe_1125 (alba)</i> gene                                                                    | This work |
| pCmr4α             | Derived from pSeSD1, expressing His-tagged Cmr4α                                                                                                        | This work |
| pCmr4α-D27A        | Derived from pCmr4α with a single mutation(D27A) of the <i>cmr4α</i> gene, expressing His-tagged Cmr4α-D27A                                             | This work |
| pAC-SS1-Cmr4α      | Derived from pAC-SS1, both carrying an artificial CRISPR locus with 1 copy of SS1 spacer and expressing His-tagged Cmr4α                                | This work |
| pAC-SS1-Cmr4α-D27A | Derived from pAC-SS1, both carrying an artificial CRISPR locus with 1 copy of SS1 spacer and expressing His-tagged Cmr4α-D27A                           | This work |
| pGE-4α-D27A        | A genome editing plasmid for single mutation(D27A) of the <i>cmr4α</i> gene in <i>S.islandicus</i>                                                      | This work |
| pGE-4α-H16A        | A genome editing plasmid for single mutation(H16A) of the <i>cmr4α</i> gene in <i>S.islandicus</i>                                                      | This work |
| pGE-4α-D83A        | A genome editing plasmid for single mutation(D83A) of the <i>cmr4α</i> gene in <i>S.islandicus</i>                                                      | This work |
| pGE-4α-K46/50A     | A genome editing plasmid for double mutation (K46A, K50A) of the <i>cmr4α</i> gene in <i>S.islandicus</i>                                               | This work |
| pGE-4α-W197A       | A genome editing plasmid for single mutation(W197A) of the <i>cmr4α</i> gene in <i>S.islandicus</i>                                                     | This work |
| pGE-4α-E199/Y201A  | A genome editing plasmid for double mutation (E199A, Y201A) of the <i>cmr4α</i> gene in <i>S.islandicus</i>                                             | This work |
| pGE-4α-K251A       | A genome editing plasmid for single mutation(K251A) of the <i>cmr4α</i> gene in <i>S.islandicus</i>                                                     | This work |
| pGE-4α-4G-A        | A genome editing plasmid for quadruple mutation (G244A, G245A, G250A, G252A) of the <i>cmr4α</i> gene in <i>S.islandicus</i>                            | This work |
| pGE-2α-HD-A        | A genome editing plasmid for double mutation (H14A, D15A) of the <i>cmr2α</i> gene in <i>S.islandicus</i>                                               | This work |
| pGE-2α-DD-A        | A genome editing plasmid for double mutation (D667A, D668A) of the <i>cmr1α</i> gene in <i>S.islandicus</i>                                             | This work |

**Supplementary table S3. Oligonucleotides used in this work**

| Oligonucleotide            | Sequence (5'-3')                                        |
|----------------------------|---------------------------------------------------------|
| MRS-up                     | ATGCCCCGGGATGTAAACAAGTTAGG                              |
| MRS-dw                     | GGCACTCGAGAAAAAAGATTTTGCTTAATGGTG                       |
| Si_1125-up                 | AAAGAATGCAGCTAAGACATAGTTCATTACTGGTTTCTTTCCTA            |
| Si_1125-dw                 | TAGCTAGGAAAGAAACCAGTAATGAAGTATGTCTTAGCTGCATT            |
| Si_1581-up                 | AAAGATTATATAATTGGATAAGATTTTTCAAAGTATTGTTTTCA            |
| Si_1581-dw                 | TAGCTGAAAACAATACTTTGAAAAATCTTATCCAATTATATAAT            |
| Cmr4 $\alpha$ -fwd         | GGGAATTCCATATGACCAAGAGTTATTTAATC                        |
| Cmr4 $\alpha$ -rev         | GTCGTGCGACTGAAATCACCTTTATTCT                            |
| 4 $\alpha$ -D27A-SpF       | AAAG ACGTGGGAATGGGTAGAGCTCCAGGCGTAGTGGATTTACC           |
| 4 $\alpha$ -D27A-SpR       | TAGC GGTAATCCACTACGCCTGGAGCTCTACCCATTCCCACGT            |
| 4 $\alpha$ -D27A-SOEF      | GCATGTTGGTATGGGTAGAGCTCCAGGCGTAGTGGCTTTACCGTTC          |
| 4 $\alpha$ -D27A-SOER      | GCCACTACGCCTGGAGCTCTACCCATACCAACATGCACTGGAGTTATTG       |
| 4 $\alpha$ -D27A-SalIF     | ACGCGTCGACTCCAAAGTGTTGAATACC                            |
| 4 $\alpha$ -D27A-NotIR     | AAGGAAAAAAGCGGCCGCTTTAATACGTTCTCGTA                     |
| 4 $\alpha$ -H16A-SpF       | AAAG ACGTGGGAATGGGTAGAGCTCCAGGCGTAGTGGATTTACC           |
| 4 $\alpha$ -H16A-SpR       | TAGC GGTAATCCACTACGCCTGGAGCTCTACCCATTCCCACGT            |
| 4 $\alpha$ -H16A-SOEF      | CAATAACTCCAGTGGCGGTGGGAATGGGTAGAGCT                     |
| 4 $\alpha$ -H16A-SOER      | CCCATTCCCACCGCCACTGGAGTTATTGCGTAGGC                     |
| 4 $\alpha$ -H16A-SalIF     | ACGC GTCGAC TCCAAAGTGTTGAATACCAT                        |
| 4 $\alpha$ -H16A-NotIR     | AAGGAAAAA GCGGCCGC TTTAATACGTTCTCGTA                    |
| 4 $\alpha$ -D83A-SpF       | AAAG ATCTAGACTGGCAATAGGGTAAAAAACTGGTATGAGATCA           |
| 4 $\alpha$ -D83A-SpR       | TAGC TGATCTCATACCAGTTTTTTACCCTATTGCCAGTCTAGAT           |
| 4 $\alpha$ -D83A-SOEF      | CACTCATACCAGTTTTTTACCCTATTGCCAGCCTTGACGGTTACGTTTATGTTTC |
| 4 $\alpha$ -D83A-SOER      | ACCGTCAAGGCTGGCAATAGGGTAAAAAACTGGTATGAGTGCAGTAACTATAAAC |
| 4 $\alpha$ -D83A-SalIF     | ACGC GTCGAC GAAAGTTTTGTCAACTAAGG                        |
| 4 $\alpha$ -D83A-NotIR     | AAGGAAAAA GCGGCCGC AATTCGCTCATGAAATCACC                 |
| 4 $\alpha$ -K46/50A-SpF    | AAAG ATGGCTCTAGCTTTAAGGGAGTTTTAAAGTCAACATTAAT           |
| 4 $\alpha$ -K46/50A-SpR    | TAGC ATTAATGTTGACTTTAAAACTCCCTTAAAGCTAGAGCCAT           |
| 4 $\alpha$ -K46/50A-SOEF   | GTATGGCTCTAGCTTTGCAGGAGTTTTAGCATCAACATTAATGAGT          |
| 4 $\alpha$ -K46/50A-SOER   | GATGCTAAAACCTCCTGCAAAGCTAGAGCCATACACTATTGGATAA          |
| 4 $\alpha$ -K46/50A-SalIF  | ACGC GTCGAC GATAAGCAGGGAAGAAGGGT                        |
| 4 $\alpha$ -K46/50A-NotIR  | AAGGAAAAA GCGGCCGC GTCCACAAATTTTGAGACGT                 |
| 4 $\alpha$ -W197A-SpF      | AAAG AAATTTGTGGACTGAGGAGTATTTACCGCAAGGAACAGTA           |
| 4 $\alpha$ -W197A-SpR      | TAGC TACTGTTCTTGCGGTAAATACTCCTCAGTCCACAAATTT            |
| 4 $\alpha$ -W197A-SOEF     | AAACGTCACAAAATTTGGCGACTGAGGAGT                          |
| 4 $\alpha$ -W197A-SOER     | TCGCCAAATTTTGTGACGTTTTATTTTCAT                          |
| 4 $\alpha$ -W197A-SalIF    | ACGC GTCGAC AATAGGTTATCCAATAGTCT                        |
| 4 $\alpha$ -W197A-NotIR    | AAGGAAAAA GCGGCCGC GACCGAAATATTCTTGCCCTA                |
| 4 $\alpha$ -E199/Y201A-SpF | AAAG AAATTTGTGGACTGAGGAGTATTTACCGCAAGGAACAGTA           |

| Oligonucleotide      | Sequence (5'-3')                                                |
|----------------------|-----------------------------------------------------------------|
| 4α-E199/Y201A-SpR    | TAGC TACTGTTTCCTTGCGGTAAATACTCCTCAGTCCACAAATTT                  |
| 4α-E199/Y201A-SOEF   | ATAAAAGACAAGGTTTATGTATTTGATAAC                                  |
| 4α-E199/Y201A-SOER   | GTTTCCTTGCGGTAAAGCCTCTGCAGTCCAC                                 |
| 4α- E199/Y201A-SalIF | ACGC GTCGAC AATAGGTTATCCAATAGTCT                                |
| 4α- E199/Y201A-NotIR | AAGGAAAAAA GCGGCCGC GACCGAAATATTCTTGCCTA                        |
| 4α-K251A-SpF         | AAAG TAGGAGGTAAGGAAACTATAGGTAAAGGACTTGTAAGAAT                   |
| 4α-K251A-SpR         | TAGC ATTCTTACAAGTCCTTTACCTATAGTTTCCTTACCTCCTA                   |
| 4α-K251A-SOEF        | GTAAGGAAACTATAGGTGCAGGACTTGTA                                   |
| 4α-K251A-SOER        | CCTATAGTTTCCTTACCTCCTAGAAATACA                                  |
| 4α-K251A-SalIF       | ACGC GTCGAC GTTTTTTACCCTATTGCCAG                                |
| 4α-K251A-NotIR       | AAGGAAAAAA GCGGCCGC ATTTTCTCACTCATATGGTA                        |
| 4α-4G-A-SpF          | AAAG TAGGAGGTAAGGAAACTATAGGTAAAGGACTTGTAAGAAT                   |
| 4α-4G-A-SpR          | TAGC ATTCTTACAAGTCCTTTACCTATAGTTTCCTTACCTCCTA                   |
| 4α-4G-A-SOEF         | CTAAGGAAACTATAGCTAAAGCACTTGTA                                   |
| 4α-4G-A-SOER         | GCTATAGTTTCCTTAGCTGCTAGAAATACA                                  |
| 4α-4G-A-SalIF        | ACGC GTCGAC GTTTTTTACCCTATTGCCAG                                |
| 4α-4G-A-NotIR        | AAGGAAAAAA GCGGCCGC ATTTTCTCACTCATATGGTA                        |
| 2α-HD-A-SpF          | AAAG CGACCCTCCTTGGAAGGCATGGGTAATTACAAGGAATATT                   |
| 2α-HD-A-SpR          | TAGC AATATTCCTTGTAATTACCCATGCCTTCCAAGGAGGGTCTG                  |
| 2α-HD-A-SOEF         | GCCTATTTTGCCGCCCTCCTTGGAAGGC                                    |
| 2α-HD-A-SOER         | GGAGGGGCGGCAAAATAGGCTATTATTTTCTTATTTAAGAAC                      |
| 2α-HD-A-SalIF        | ACGC GTCGAC TCTGGCAAGATATTAGAC                                  |
| 2α-HD-A-NotIR        | AAGGAAAAAA GCGGCCGC GTGGGGATAAGAAATAAATTAAGTGG                  |
| 2α-DD-A-SpF          | AAAG GTTAAACTTTATAGGCGATAACGCCAATATGTCGTCACCA                   |
| 2α-DD-A-SpR          | TAGC TGGTGACGACATATTGGCGTTATCGCCTATAAAGTTTAAC                   |
| 2α-DD-A-SOEF         | TTGGCGTTATCGCCTATAAAATTCAATGAAAAGTACGTAG                        |
| 2α-DD-A-SOER         | CTTTTCATTGAATTTTATAGGCGATAACGCCAAAATAGCAGCACCACCCAAAT<br>ATATAG |
| 2α-DD-A-SalIF        | ACGC GTCGAC TCGGCCTGTAATATCAGTGAC                               |
| 2α-DD-A-NotIR        | AAGGAAAAAA GCGGCCGC GTCATATTCCCCGCTCTT                          |

**Supplementary table S4. Nucleic acid substrates used in this work**

| Name   | Sequence (5'-3')                                                 | Size (mer) |
|--------|------------------------------------------------------------------|------------|
| RNA    |                                                                  |            |
| SS1-46 | UGUUAAGUCUGGUUUCCCUCCAGGGUAUCUAAGCUUUGAAAAAAAAA                  | 46         |
| DNA    |                                                                  |            |
| S10-60 | ACTATAGGGAGaATAGAATGCCCCCATTATACAATATCTACGTTTTAGATGAc<br>ccccccc | 60         |

## 2. Supplementary figures

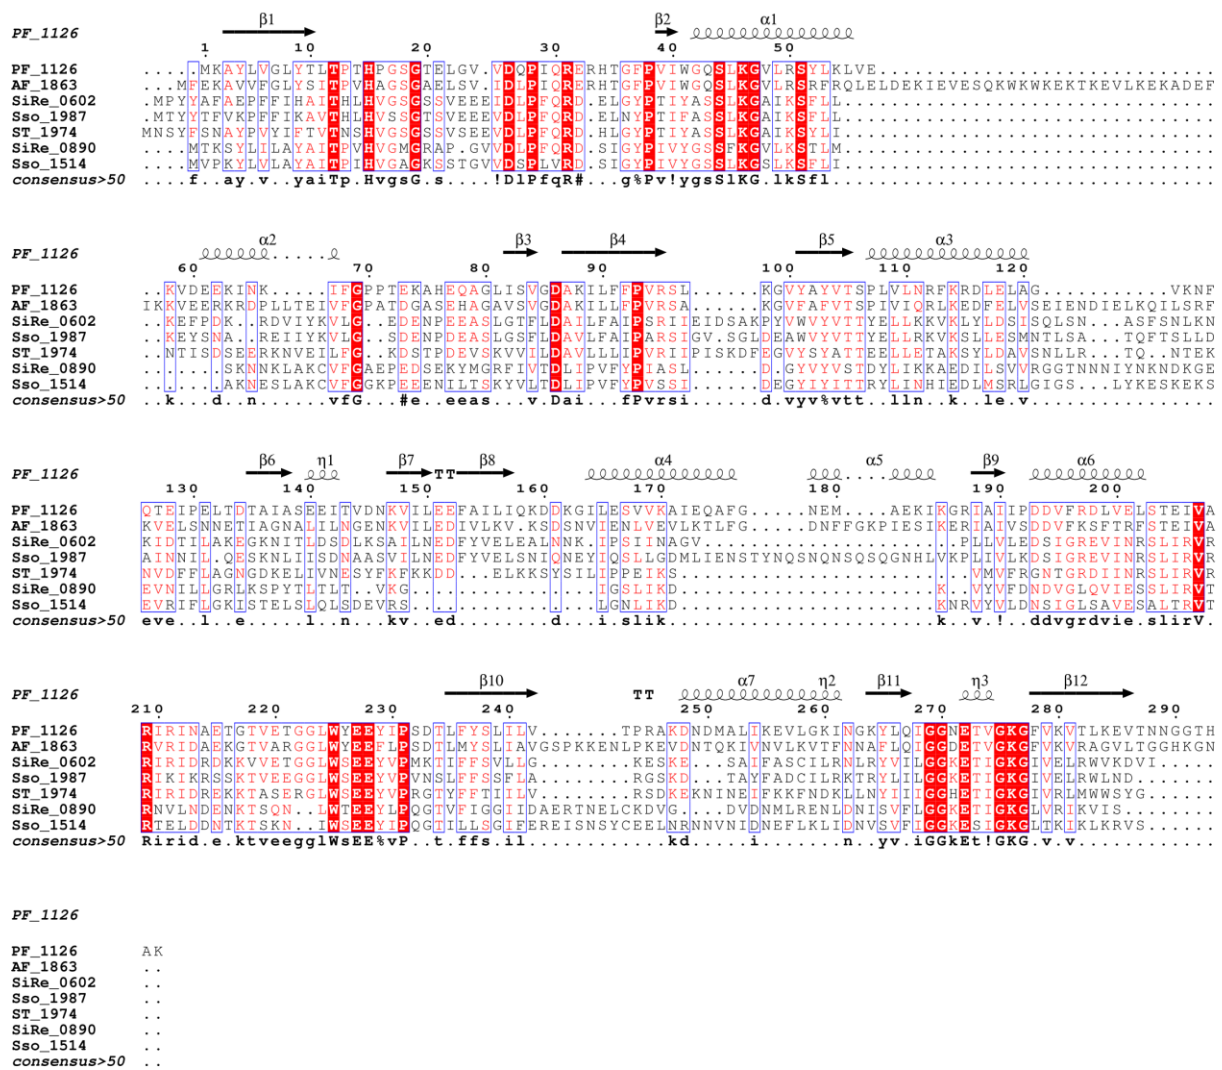

**Supplementary figure S1.** Conserved residues in *S. islandicus* Cmr4 $\alpha$ . Seven Cmr4 homologues (PF\_1126, AF\_1863, SiRe\_0890, SSo1514, SSo\_1987, SiRe\_0602, ST\_1974) were selected and aligned using ESPript 3.x (8). Thirteen highly conserved residues/motifs were chosen to produce eight Cmr4 $\alpha$  mutants as indicated below: Cmr4 $\alpha$ -H16A, Cmr4 $\alpha$ -D27A, Cmr4 $\alpha$ -D83A, Cmr4 $\alpha$ -K46/50A, Cmr4 $\alpha$ -W197A, Cmr4 $\alpha$ -E199/Y201A, Cmr4 $\alpha$ -K251A and Cmr4 $\alpha$ -4G-A.

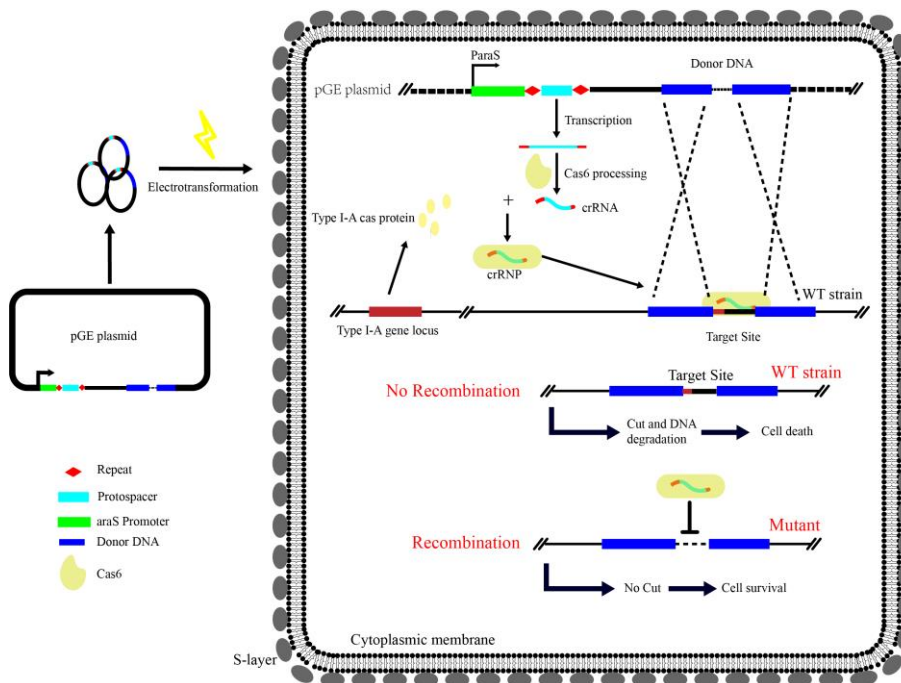

**Supplementary figure S2.** Mutagenesis was conducted by introduction of pGE plasmids into  $\Delta\text{Cmr-}\beta$  cells by electroporation. The rationale is that crRNAs expressed from the CRISPR array in pGE plasmids guide the endogenous I-A immunity to specifically target individual fragment of the wild-type *cmr4 $\alpha$*  gene for degradation, and in the meantime, the plasmid-borne homologous arms carrying the mutated *cmr4 $\alpha$*  gene are allowed to recombine with the wild-type gene, giving the corresponding mutated *cmr4 $\alpha$*  gene in the host chromosome.

A

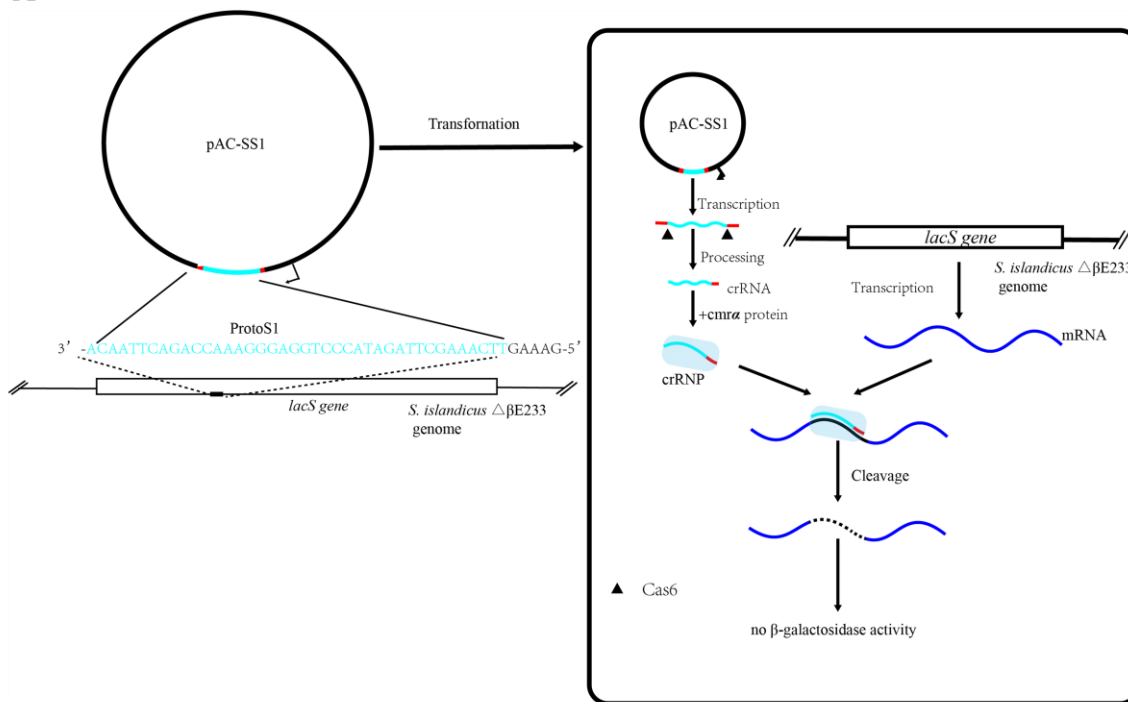

B

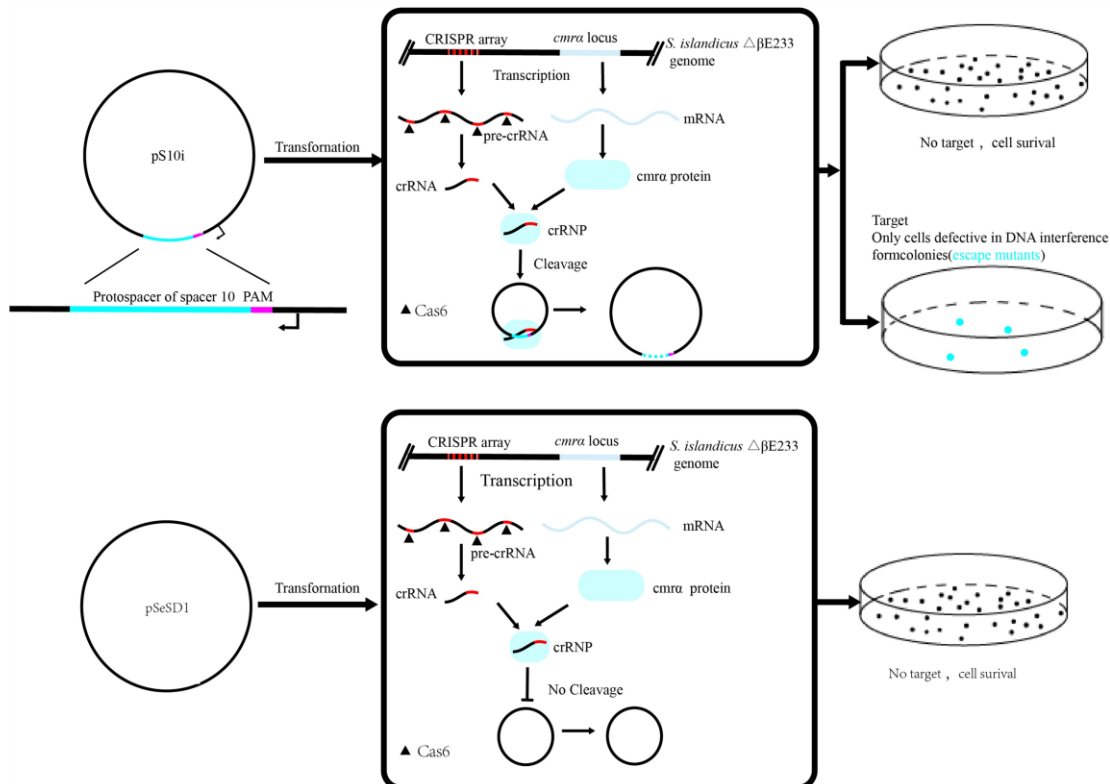

**Supplementary figure S3.** Two genetic assays developed for *S. islandicus*: the mini-CRISPR and reporter gene-based RNA interference assay (A) and the interference plasmid assay (B)



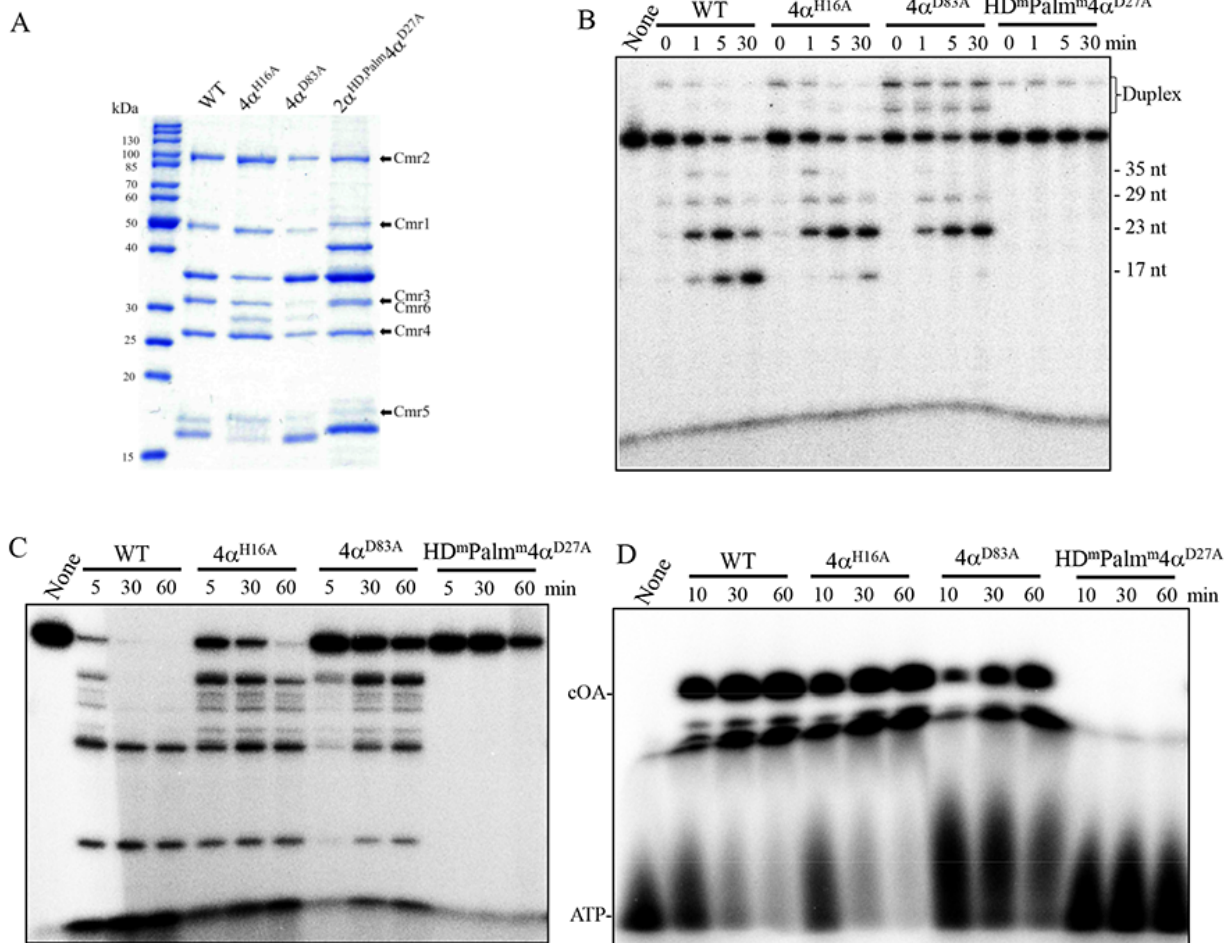

**Supplementary figure S4.** In vitro activities of wild type (WT) Cmr- $\alpha$ , Cmr- $\alpha$ \_4 $\alpha^{H16A}$ , Cmr- $\alpha$ \_4 $\alpha^{D83A}$  and Cmr- $\alpha$ \_HD<sup>m</sup>,Palm<sup>m</sup>4 $\alpha^{D27A}$ . (A) SDS-PAGE analysis, (B) target RNA cleavage, (C) DNA cleavage and (D) cOA synthesis activity of the four complexes. None: Substrate only, no Cmr complex was added. Cleavage assay was conducted for the time periods indicated in the figures; Duplex: duplex of crRNA and substrate; cOA: cyclic tetra-adenylates.

## References

1. Li, Y., Pan, S., Zhang, Y., Ren, M., Feng, M., Peng, N., Chen, L., Liang, Y.X. and **She, Q.** (2016) Harnessing Type I and Type III CRISPR-Cas systems for genome editing. *Nucleic acids research*, **44**, e34.
2. Peng, W., Li, H., Hallstrom, S., Peng, N., Liang, Y.X. and She, Q. (2013) Genetic determinants of PAM-dependent DNA targeting and pre-crRNA processing in *Sulfolobus islandicus*. *RNA biology*, **10**, 738-748.
3. Han, W., Li, Y., Deng, L., Feng, M., Peng, W., Hallstrom, S., Zhang, J., Peng, N., Liang, Y.X., White, M.F. *et al.* (2017) A type III-B CRISPR-Cas effector complex mediating massive target DNA destruction. *Nucleic acids research*, **45**, 1983-1993.
4. Peng, N., Deng, L., Mei, Y., Jiang, D., Hu, Y., Awayez, M., Liang, Y. and **She, Q.** (2012) A synthetic arabinose-inducible promoter confers high levels of recombinant protein expression in

hyperthermophilic archaeon *Sulfolobus islandicus*. *Applied and environmental microbiology*, **78**, 5630-5637.

5. Peng, W., Feng, M., Feng, X., Liang, Y.X. and **She, Q.** (2015) An archaeal CRISPR type III-B system exhibiting distinctive RNA targeting features and mediating dual RNA and DNA interference. *Nucleic acids research*, **43**, 406-417.
6. Li, Y., Zhang, Y., Lin, J., Pan, S., Han, W., Peng, N., Liang, Y.X. and She, Q. (2017) Cmr1 enables efficient RNA and DNA interference of a III-B CRISPR-Cas system by binding to target RNA and crRNA. *Nucleic Acids Res*, **45**, 11305-11314.
7. Deng, L., Garrett, R.A., Shah, S.A., Peng, X. and She, Q. (2013) A novel interference mechanism by a type IIIB CRISPR-Cmr module in *Sulfolobus*. *Mol Microbiol*, **87**, 1088-1099.
8. Robert, X. and Gouet, P. (2014) Deciphering key features in protein structures with the new ENDscript server. *Nucleic Acids Res*, **42**, W320-324.
